# Supplementary material for: Solvent Extraction of Polyphenolics from the Indigenous African Fruit Ximenia caffra and Characterization by LC-HRMS
Source: MDPI journal article supplement (doi:10.3390/antiox7080103), 2018-08-01
Supplement: s1 [file s1]

NG Residue extract  
NG\_Figs\_170306\_5

1: TOF MS ES-  
BPI  
8.36e4

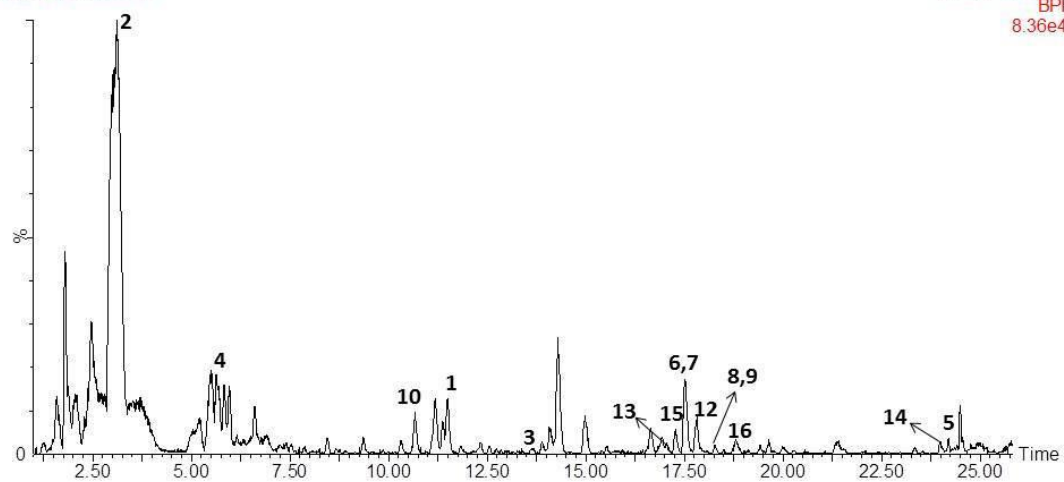

**Figure S1.** Chromatogram showing peaks and retention times of the positively identified compounds. The numbers indicated correspond to the numbering of compounds in Table 1.
